# Supplementary material for: Identification of Bacillus anthracis, Brucella spp., and Coxiella burnetii DNA signatures from bushmeat
Source: PubMed Central journal article supplement (PMC8295346; doi:10.1038/s41598-021-94112-9), 2021-07-21
Supplement: 41598_2021_94112_MOESM2_ESM.pdf [file 41598_2021_94112_MOESM2_ESM.pdf]

**IDENTIFICATION OF *BACILLUS ANTHRACIS*, *BRUCELLA SPP.*, AND *COXIELLA BURNETII* DNA SIGNATURES FROM BUSHMEAT**

Robab Katani<sup>1,2†</sup>, Megan A. Schilling<sup>2,3†</sup>, Beatus Lyimo<sup>4†</sup>, Ernest Eblate<sup>4,5</sup>, Andimile Martin<sup>4</sup>, Triza Tonui<sup>6</sup>, Isabella M. Cattadori<sup>2,4,7</sup>, Stephen C. Francesconi<sup>8</sup>, Anna B. Estes<sup>2,4\*\*</sup>, Dennis Rentsch<sup>9</sup>, Sreenidhi Srinivasan<sup>2</sup>, Samson Lyimo<sup>4</sup>, Lidia Munuo<sup>4</sup>, Christian K. Tiambo<sup>6</sup>, Francesca Stomeo<sup>6\*\*\*</sup>, Paul Gwakisa<sup>10</sup>, Fausta Moshia<sup>11</sup>, Peter J. Hudson<sup>1,2,4,7</sup>, Joram J. Buza<sup>4</sup> and Vivek Kapur<sup>1,2,3,4\*</sup>

Supplemental Table 1. List and sequences of primers and probes for pathogen detection.

| Target                    | name                                     | Nucleotide sequence (5' -3')  |                            | Probe [6FAM]                     | Quenchers | PCR conditions                                                               |
|---------------------------|------------------------------------------|-------------------------------|----------------------------|----------------------------------|-----------|------------------------------------------------------------------------------|
|                           |                                          | Forward                       | Reverse                    |                                  |           |                                                                              |
| <i>Bacillus anthracis</i> | <i>Protective Antigen (PA) p XO1</i>     | TTCAAGTTGTACT<br>GGACCGATTCTC | TCCATCATTGTC<br>ACGGTCTGG  | CCGTAGGTCCAGCAC<br>TTGTACTTCGCTT | TAMRA     | 95°C for 2 min, followed by 45 cycles of 95°C for 10 sec and 60°C for 20 sec |
|                           | <i>Capsule B (CAPB2) p XO2</i>           | GCTGACCAATCTA<br>AGCCTGC      | GGCAAACATCC<br>CTAGCAAA    | TTGTAATTATGAATT<br>GCCGCCCTGACC  |           |                                                                              |
| <i>Brucella sp.</i>       | <b>Outer Membrane Protein 2b (OMP2b)</b> | ATGAACATCAAGA<br>GCCTTCTCCTT  | GGTGCCCGGAAT<br>GTAGAAGTAG | TCTGGTTGCAGCTTC                  | NFQ-MGB   | 95°C for 2 min followed by 45 cycles of 95°C for 10 sec and 60°C for 30 sec  |
| <i>Coxiella burnetii</i>  | <b>Insertion Element IS1111</b>          | AATTTTCATCGTTC<br>CCGGCAG     | GCCGCGTTTACT<br>AATCCCA    | TGTCGGCGTTTATTG<br>GGTTGGTCCC    | TAMRA     | 96°C for 2 min, followed by 45 cycles of 96°C for 5 sec and 60°C for 1 min   |
