# Supplementary material for: Identification of Bacillus anthracis, Brucella spp., and Coxiella burnetii DNA signatures from bushmeat
Source: PubMed Central journal article supplement (PMC8295346; doi:10.1038/s41598-021-94112-9), 2021-07-21
Supplement: 41598_2021_94112_MOESM3_ESM.pdf [file 41598_2021_94112_MOESM3_ESM.pdf]

**IDENTIFICATION OF *BACILLUS ANTHRACIS*, *BRUCELLA SPP.*, AND *COXIELLA BURNETII* D**

Robab Katani<sup>1,2†</sup>, Megan A. Schilling<sup>2,3†</sup>, Beatus Lyimo<sup>4†</sup>, Ernest Eblate<sup>4,5</sup>, Andimile Martin<sup>4</sup>, Triza Tonui<sup>6</sup>, Isab Cattadori<sup>2,4,7</sup>, Stephen C. Francesconi<sup>8</sup>, Anna B. Estes<sup>2,4\*\*</sup>, Dennis Rentsch<sup>9</sup>, Sreenidhi Srinivasan<sup>2</sup>, Samson Lyii Munuo<sup>4</sup>, Christian K. Tiambo<sup>6</sup>, Francesca Stomeo<sup>6\*\*\*</sup>, Paul Gwakisa<sup>10</sup>, Fausta Mosha<sup>11</sup>, Peter J. Hudson<sup>1,2,4,7</sup>, J Buza<sup>4</sup> and Vivek Kapur<sup>1,2,3,4\*</sup>

Supplemental Table 2. Metadata for 77 bushmeat samples identified by real-time PCR as pathogen-positive.

| <b>Description</b> | <b>Species</b> | <b>Season</b> | <b>Condition</b> | <b>Region</b> | <b>Pathogen</b> |
|--------------------|----------------|---------------|------------------|---------------|-----------------|
| A_R01              | Dikdik         | Dry           | Fresh            | Ruaha         | Anthrax         |
| A_Sel01            | Hare           | Rainy         | Fresh            | Selous        | Anthrax         |
| A_Sel02            | Hippo          | Rainy         | Fresh            | Selous        | Anthrax         |
| A_Ser06            | Wildebeest     | Rainy         | Fresh            | Serengeti     | Anthrax         |
| A_Ser07            | Wildebeest     | Rainy         | Fresh            | Serengeti     | Anthrax         |
| A_Ser08            | Wildebeest     | Rainy         | Fresh            | Serengeti     | Anthrax         |
| A_Ser03            | Wildebeest     | Rainy         | Fresh            | Serengeti     | Anthrax         |
| A_Ser09            | Wildebeest     | Rainy         | Fresh            | Serengeti     | Anthrax         |
| A_Ser10            | Wildebeest     | Rainy         | Fresh            | Serengeti     | Anthrax         |
| A_Ser11            | Buffalo        | Rainy         | Fresh            | Serengeti     | Anthrax         |
| A_Ser12            | Wildebeest     | Rainy         | Fresh            | Serengeti     | Anthrax         |
| A_Ser13            | Wildebeest     | Rainy         | Fresh            | Serengeti     | Anthrax         |
| A_Ser14            | Wildebeest     | Rainy         | Fresh            | Serengeti     | Anthrax         |
| A_Ser04            | Wildebeest     | Rainy         | Fresh            | Serengeti     | Anthrax         |
| B_R01              | Dikdik         | Dry           | Fresh            | Ruaha         | Brucella        |
| B_R02              | Dikdik         | Dry           | Fresh            | Ruaha         | Brucella        |
| B_R13              | Dikdik         | Dry           | Fresh            | Ruaha         | Brucella        |
| B_R03              | Buffalo        | Dry           | Fresh            | Ruaha         | Brucella        |
| B_R04              | Dikdik         | Dry           | Fresh            | Ruaha         | Brucella        |
| B_R05              | Dikdik         | Dry           | Fresh            | Ruaha         | Brucella        |
| B_R14              | Dikdik         | Dry           | Fresh            | Ruaha         | Brucella        |
| B_R06              | Dikdik         | Dry           | Fresh            | Ruaha         | Brucella        |
| B_R07              | Dikdik         | Dry           | Fresh            | Ruaha         | Brucella        |
| B_R08              | Dikdik         | Dry           | Fresh            | Ruaha         | Brucella        |
| B_R15              | Dikdik         | Dry           | Fresh            | Ruaha         | Brucella        |
| B_R16              | Dikdik         | Dry           | Fresh            | Ruaha         | Brucella        |
| B_R17              | Dikdik         | Dry           | Fresh            | Ruaha         | Brucella        |
| B_R09              | Dikdik         | Dry           | Fresh            | Ruaha         | Brucella        |
| B_R10              | Dikdik         | Dry           | Fresh            | Ruaha         | Brucella        |
| B_R11              | Dikdik         | Dry           | Fresh            | Ruaha         | Brucella        |
| B_R18              | Dikdik         | Dry           | Fresh            | Ruaha         | Brucella        |
| B_R12              | Dikdik         | Dry           | Fresh            | Ruaha         | Brucella        |
| B_Sel05            | Cattle         | Dry           | Fresh            | Selous        | Brucella        |
| B_Sel06            | Cattle         | Dry           | Fresh            | Selous        | Brucella        |

|         |            |       |           |           |          |
|---------|------------|-------|-----------|-----------|----------|
| B_Sel02 | Cattle     | Dry   | Fresh     | Selous    | Brucella |
| B_Sel03 | Cattle     | Dry   | Fresh     | Selous    | Brucella |
| B_Sel07 | Cattle     | Dry   | Fresh     | Selous    | Brucella |
| B_Sel08 | Cattle     | Dry   | Fresh     | Selous    | Brucella |
| B_Sel09 | Cattle     | Dry   | Fresh     | Selous    | Brucella |
| B_Sel04 | Cattle     | Dry   | Fresh     | Selous    | Brucella |
| B_Sel10 | Hare       | Rainy | Fresh     | Selous    | Brucella |
| B_Ser02 | Wildebeest | Rainy | Fresh     | Serengeti | Brucella |
| B_Ser03 | Wildebeest | Rainy | Fresh     | Serengeti | Brucella |
| B_Ser04 | Wildebeest | Rainy | Fresh     | Serengeti | Brucella |
| B_Ser06 | Wildebeest | Rainy | Fresh     | Serengeti | Brucella |
| C_R02   | Impala     | Dry   | Fresh     | Ruaha     | Coxiella |
| C_R03   | Dikdik     | Dry   | Fresh     | Ruaha     | Coxiella |
| C_R05   | Wildebeest | Rainy | Fresh     | Ruaha     | Coxiella |
| C_Sel10 | Hare       | Dry   | Fresh     | Selous    | Coxiella |
| C_Sel01 | Impala     | Dry   | Fresh     | Selous    | Coxiella |
| C_Sel11 | Impala     | Dry   | Fresh     | Selous    | Coxiella |
| C_Sel12 | Impala     | Dry   | Fresh     | Selous    | Coxiella |
| C_Sel02 | Impala     | Dry   | Fresh     | Selous    | Coxiella |
| C_Sel03 | Impala     | Dry   | Fresh     | Selous    | Coxiella |
| C_Sel04 | Cattle     | Dry   | Fresh     | Selous    | Coxiella |
| C_Sel05 | Zebra      | Rainy | Fresh     | Selous    | Coxiella |
| C_Sel13 | Hippo      | Rainy | Fresh     | Selous    | Coxiella |
| C_Sel14 | Zebra      | Rainy | Fresh     | Selous    | Coxiella |
| C_Sel15 | Pig        | Rainy | Fresh     | Selous    | Coxiella |
| C_Sel16 | Buffalo    | Rainy | Fresh     | Selous    | Coxiella |
| C_Sel17 | Zebra      | Rainy | Fresh     | Selous    | Coxiella |
| C_Sel18 | Dikdik     | Rainy | Fresh     | Selous    | Coxiella |
| C_Sel06 | Gazelle    | Rainy | Fresh     | Selous    | Coxiella |
| C_Sel07 | Pig        | Rainy | Fresh     | Selous    | Coxiella |
| C_Sel08 | Cane Rat   | Rainy | Fresh     | Selous    | Coxiella |
| C_Sel09 | Buffalo    | Rainy | Fresh     | Selous    | Coxiella |
| C_Sel19 | Gazelle    | Rainy | Fresh     | Selous    | Coxiella |
| C_Ser01 | Eland      | Rainy | Fresh     | Serengeti | Coxiella |
| A_Sel03 | Impala     | Dry   | Processed | Selous    | Anthrax  |
| A_Ser05 | Pig        | Dry   | Processed | Serengeti | Anthrax  |
| A_Ser01 | Zebra      | Rainy | Processed | Serengeti | Anthrax  |
| A_Ser02 | Zebra      | Rainy | Processed | Serengeti | Anthrax  |
| B_Sel01 | Wildebeest | Rainy | Processed | Selous    | Brucella |
| B_Ser05 | Topi       | Rainy | Processed | Serengeti | Brucella |
| B_Ser01 | Impala     | Rainy | Processed | Serengeti | Brucella |
| C_R01   | Dikdik     | Dry   | Processed | Ruaha     | Coxiella |
| C_R04   | Dikdik     | Rainy | Processed | Ruaha     | Coxiella |
